# Supplementary material
Source: publisher site journal article supplement (https://static.cambridge.org/content/id/urn:cambridge.org:id:article:S1092852920001443/resource/name/S1092852920001443supp001.doc)
Supplement: Supplementary file 1 [file S1092852920001443supp001.doc]

***Detailed biochemical procedures***

*Chemicals*

All reagents and chemicals employed in this study were of the best analytical grade for chemical chemistry laboratories (Sigma-Aldrich, Milan, Italy; Applichem, Nova Chimica Srl, Milan, Italy; Romil, Pure Chemistry, Cambridge, GB). Ultrapure water used for all solutions and buffers was produced using the ICW3000 *Simplicity* system (Millipore) for analytical, life science and chromatography (gradient grade) use. UA, SOD, CAT and GST assays were determined using dedicated kits purchased from Cayman Chemical (Ann Arbor, MI, USA).

*Collection of biological samples*

Biochemical evaluations were performed starting from whole blood. Peripheral venous blood was collected from all subjects in the morning, between 9.00 and 10.30 *am*. In particular, 12 mL were collected in test tubes containing K3EDTA as the anticoagulant for the determination of almost all the parameters object of the investigation; additionally, 3 mL were collected in test tubes containing lithium-heparin for the determination of the iron-reducing capacity parameters FRAP. After collection, all blood samples were treated within 30 minutes from withdraws at the laboratories of Biochemistry (Department of Pharmacy) and Neurology (Department of Clinical and Experimental Medicine, University of Pisa).

Half of the test tubes containing blood in K3EDTA and the blood test tube in heparin were centrifuged at 1,500 g for 10 min, at 4°C, in order to separate plasma for the determination of AOPP, TT (EDTA tubes) and FRAP (heparin tubes). The remaining test tubes containing blood in EDTA (6 mL) were first centrifuged at low-speed (150 g for 15 min at RT), to obtain the platelet-rich plasma (PRP), then at 1,500 g for 15 min at RT to obtain platelet-poor plasma (PPP) and platelet pellets (PP): platelets (PP) were stored at -80°C and used for other investigations not included in this study. PPP was instead employed to appraise SOD, CAT, GST, UA and IL-6. All EDTA and heparin plasma samples were properly marked, aliquoted in low-binding eppendorf tubes and stored at -80°C until assay.

*Determination of the plasma oxidative stress markers*

Spectrophotometric/colorimetric assays, using 96-wells microtiter plates, and a spectrophotometric microplate reader (EnsPire Multilabel 2300 plate spectrophotometer, Perkin-Elmer/Thermofisher Scientific, Waltham, MA, USA) were used to measure the 8 parameters of oxidative stress under investigation. When not supplied by the kit, the 96-wells microplates were purchased from Sigma Aldrich, Milan, Italy (Corning Costar plates). All incubation and shaking steps applied during the analytical procedures were carried out by means of a 96-wells microplate thermostat (PST 60-HL, Biosan, Riga, Latvia). All the tests were carried out in duplicate. The coefficient of variations of the methods chosen to determine each parameter under investigation in this study were < 5% for intra-day measures or comprised between 2% and 10% for inter-day assays. These values were achievable under proper plasma storage conditions and for samples thawed no more than twice. As concerns the methods’ sensitivity, this was suitable enough to carry out the assay in the biological matrix used, producing absorbance values always fitting within the calibration line or reproducible measures in respect to the instrument signal-to-noise ratio.

*Measure of AOPP*

The method described by Witko-Sarsat et al. 1 was employed to evaluate plasma AOPP, a marker of oxidative damage due to H2O2 accumulation and subsequent formation of HClO that impacts proteins. This method uses potassium iodide (KI) as the reagent and chloramine-T (N-Chloro 4- methylbenzenesulfonamide, sodium salt) as the standard, a compound that mimics chlorinated proteins. The concentration of AOPP was thus interpolated from the linear regression equation of net A340nm of Chloramine-T as a function of Chloramine-T levels. Plasma AOPP levels were then expressed as nmol ml-1 of Chloramine-T equivalents.

*Determination of Ferric reducing antioxidant power (FRAP)*

The colorimetric method used herein to assess the antioxidant power of plasma has been developed by Benzie and Strain. 2 The reaction occurs, under acidic conditions, between the complex Fe3+-2,4,6-Tris-(2-pyridyl)-s-triazine (TPTZ) and plasma anti-oxidant components: reduced ferric ions of the complex to ferrous ions give a blue color, proportional to the reducing power. The test is not specific: every compound displaying a redox potential lower than the Fe3+/Fe2+ can initiate the reaction. The standard calibration line was built using iron sulphate heptahydrate (FeSO4·7H2O) solutions in 0.01M HCl. Blank, calibration solutions and thawed plasma samples were incubated with the FRAP reagent and read at A620 nm. FRAP amounts in plasma were interpolated from the linear regression calibration equation and expressed as mmol L-1.

*Measure of UA*

UA, the main component of plasma FRAP, was determined using a fluorescence-based assay. The assay has been set up from the reaction of urate oxidase or uricase (EC 1.7.3.3) that transforms UA into allantoin and H2O2. The formed H2O2, in the presence of horseradish peroxidase, reacts stoichiometrically with 10-acetyl-3,7-dihydrophenoxazine (ADHP) to produce the fluorescent compound resorufin, a tricyclic fluorescent dye. 3 Blanks, standard solutions of UA, plasma sample aliquots thawed and diluted 1:15 in the assay buffer were incubated in the presence of ADHP, uricase and peroxidase. Fluorescence was read at λ ex = 535 and  λ em = 590. UA sample concentration, calculated from the calibration curve after correction for the dilution factor, was reported as mmol L-1.

*Determination of TT (R-SH)*

The method used herein to evaluate TT (R-SH) in plasma samples was the colorimetric assay described by Hu in 1994. 4 The principle is based on the reduction reaction of 5,5-dithio-2-dinitrobenzoic acid (DTNB or Ellman’s reagent) by sulfide groups –SH, giving a yellow-colored compound, 2-nitro-5-thiobenzoate (TNB).

Blanks, standards and thawed plasma samples were mixed in test tubes with Tris-EDTA buffer, methanol and DTNB. After incubation and centrifugation, ensuing supernatants were transferred in a 96-well micro-plate and absorbance read at λ = 405nm. To calculate TT in plasma of each subject, average A405nm of blank was subtracted to sample A405nm and TT levels were calculated from the molar extinction coefficient of TNB and Lambert-Beer equation. Thiols were expressed as μmol L-1.

*Superoxide dismutase (SOD) assay*

To evaluate plasma SOD, a competitive colorimetric assay was employed, according to Peskin and Winterbourn 5 and Zhou and Prognon. 6 The assay uses xanthine oxidase (XO) to generate superoxide ions O2-, which, in the presence of tetrazolium salts, form in turn a yellow-colored compound, formazan, absorbing at 450nm. In the presence of SOD, O2- anions are dismutated in H2O2 and O2, avoiding the reduction of tetrazolium salts to the formazan dye. For assay, blanks, plasma samples diluted 1:5 in sample buffer and standard dilutions of bovine erythrocyte SOD were incubated with the tetrazolium dye solution (radical detector) and assay buffer, containing the substrate of XO, hypoxanthine. The reaction was initiated by adding XO to each well. After 30 min at room temperature using the micro-plate shaker (400 rpm), absorbance (A450nm) was read at the spectrophotometer. SOD activity in unknowns was interpolated from the linear equation parameters, corrected for the dilution factor and expressed as U ml-1, where 1 Unit of SOD is the total enzyme amount required to dismutate the 50% of the O2- radical.

*Catalase (CAT) assay*

In this study, we appraised plasma CAT activity using a method based on a procedure previously described by Johansson and Borg. 7 The method considers the CAT peroxidatic activity, or the enzyme ability to transform methanol into formaldehyde and H2O, in the presence of H2O2, this last added to each well to initiate the reaction. Formaldehyde contained in standard solutions and formaldehyde formed by sample CAT activity are measured using the compound 4-amino-3-hydrazino-5-mercapto-1,2,4-triazole (Purpald) as the chromogen. Purpald reacts specifically with aldehydes forming a bicyclic heterocycle which in turn, under oxidation conditions in the presence of K/Na-periodate (Na/KIO4), gives a purple colored compound that can be read at 540 nm. 8 The calibration curve was prepared using formaldehyde solutions (0 to 150μM) as the standard. After linear regression analysis of A540nm formaldehyde standard solutions and correction for sample dilution, the enzyme activity from each sample was obtained as nanomol*(formaldehyde)* min-1 ml-1.

*Glutathione transferase (GST) assay*

Total plasma GST was appraised herein in a subgroup of patients (N = 21) and HC (N = 16) by means of an assay kit based upon the method of Habig et al. 9 The principle consists in measuring the rate of A340nm increase due to the GST conjugation of GSH with 1-chloro-2,4-dinitrobenzene (CDNB): the A340nm increase is proportional to sample GST activity. For assay, diluted plasma samples and the positive control (equine liver GST) were added to assay buffer, GSH and CDNB and read at A340nm for 5 min (1 min interval) to evaluate the A340nm increase, due to the formation of the GSH-CDNB conjugate. GST activity (nmol/min-1 ml-1) was calculated from A340nm/min, CDNB extinction coefficient at 340nm and sample dilution.

*Interleukin 6 levels*

The pro-inflammatory, macrophage-released cytokine IL-6 was measured in plasma samples of the subjects by means of an Immuno-enzyme ELISA assay kit (Picokine IL-6 assay, Boster Biological Technology, Pleasanton, CA, USA), based upon a sandwich procedure, using a primary monoclonal anti-IL-6 capture antibody, a secondary antibody conjugated with biotin and a complex formed by streptavidin-biotin-peroxidase to amplify the signal. The day of assay, plasma samples were thawed, diluted in Sample diluent buffer and immediately used for IL-6 quantitation. The plate absorbance was read at 450 nm. Calibration lines were built using a 4-parameter logistic (4PL) non-linear regression equation and IL-6 in unknowns interpolated as pg ml-1. The method’s sensitivity is very high, with a limit of determination as low as 0.3 pg ml-1.

**References**

1. Witko-Sarsat V, Friedlander M, Capeillère-Blandin C, et al. Advanced oxidation protein products as a novel marker of oxidative stress in uremia. *Kidney International.* 1996;49(5):1304–1313.

2. Benzie IFF, Strain JJ. The ferric reducing ability of plasma (FRAP) as a measure of “antioxidant power”: The FRAP Assay. *Anal Biochem.* 1996;239(1):70–76.

3. Helenius M, Jalkanen S, Yegutkin GG. Enzyme-coupled assays for simultaneous detection of nanomolar ATP, ADP, AMP, adenosine, inosine and pyrophosphate concentrations in extracellular fluids. *Biochimica et Biophysica Acta: Molecular Cell Res.* 2012;1823(10):1967–1975.

4. Hu ML. Measurement of protein thiol groups and glutathione in plasma. *Methods Enzymol.* 1994;233:380–385.

5. Peskin AV, Winterbourn CC. A microtiter plate assay for superoxide dismutase using a water- soluble tetrazolium salt (WST-1). *Clin Chim Acta.* 2000;293(1-2):157–166.

6. Zhou JY, Prognon P. Raw material enzymatic activity determination: a specific case for validation and comparison of analytical methods--the example of superoxide dismutase (SOD). *J Pharm Biomed Anal.* 2006;40(5):1143-1148.

7. Johansson LH, Borg LA. A spectrophotometric method for determination of catalase activity in small tissue samples. *Anal Biochem.* 1988;174(1):331–336.

8. Jendral JA, Monakhova YB, Lachenmeier DW. Formaldehyde in alcoholic beverages: large chemical survey using purpald screening followed by chromotropic Acid spectrophotometry with multivariate curve resolution. *Int J Anal Chem.* 2011;2011:797604.

9. Habig WH, Pabst MJ, Jakoby WB. Glutathione S-transferases. The first enzymatic step in mercapturic acid formation. *J Biol Chem.* 1974;249(22):7130–7139.
